1 Tracking *Borrelia afzelii* from infected *Ixodes ricinus* nymphs to mice suggests a direct  
2 'gut-to-mouth' route of Lyme disease transmission

3

4 Tereza Pospisilova,<sup>a,b</sup> Veronika Urbanova,<sup>a</sup> Ondrej Hes,<sup>c</sup> Petr Kopacek,<sup>a</sup> Ondrej  
5 Hajdusek,<sup>a</sup> Radek Sima<sup>a#</sup>

6

7 <sup>a</sup>Institute of Parasitology, Biology Centre of the Czech Academy of Sciences,  
8 Branisovska 31, 370 05 Ceske Budejovice, Czech Republic

9 <sup>b</sup>Faculty of Science, University of South Bohemia, Branisovska 31, 370 05 Ceske  
10 Budejovice, Czech Republic

11 <sup>c</sup>Department of Pathology, Charles University, Medical Faculty and Charles University  
12 Hospital, Alej Svobody 80, 304 60 Plzen, Czech Republic

13

14 Running head: 'Gut-to-mouth' route of *Borrelia afzelii* transmission

15

16 #Address correspondence to Radek Sima, email: [sima@paru.cas.cz](mailto:sima@paru.cas.cz)

## 17 **Abstract**

18 Quantitative tracking of *Borrelia afzelii* has shown that its transmission cycle differs  
19 from the salivary route of *B. burgdorferi* transmission by *Ixodes scapularis*. *Borrelia*  
20 *afzelii* are abundant in the guts of unfed *Ixodes ricinus* nymphs and their numbers  
21 continuously decrease during feeding. In contrast, spirochetes are not present in the  
22 salivary glands. *Borrelia afzelii* transmission starts during the early stages of feeding,  
23 spirochetes could be detected in murine skin within 1 day of tick attachment. Tick saliva  
24 is not essential for *B. afzelii* infectivity, the main requirement for successful host  
25 colonization being a change in outer surface protein expression that occurs in the tick  
26 gut during feeding. Spirochetes in vertebrate mode are able to survive within the host  
27 even if the tick is not present. On the basis of our data we propose that a direct 'gut-  
28 to-mouth' route of infection appears to be the main route of *B. afzelii* transmission.

29

## 30 **Importance**

31 Lyme borreliosis is the most common vector-borne disease in the USA and Europe.  
32 The disease is caused by the *Borrelia* spirochetes and is transmitted through *Ixodes*  
33 ticks. A better understanding of how *Borrelia* spirochetes are transmitted is crucial for  
34 development of efficient vaccines for preventing Lyme borreliosis. Here we present  
35 that the transmission of European *B. afzelii* spirochetes by *I. ricinus* ticks significantly  
36 differs from the model transmission cycle described for American *B. burgdorferi*/  
37 *scapularis*. We suggest that *B. afzelii* is not transmitted via salivary glands but most  
38 likely through the 'midgut to mouthpart' route. We further demonstrate that tick saliva  
39 is not important for *B. afzelii* transmission and infectivity. Therefore, we support early  
40 studies by Willy Burgdorfer, who proposed that *Borrelia* transmission occurs by

41 regurgitation of infected gut contents. Our findings collectively point to the *Borrelia*-tick  
42 midgut interface as the correct target in our endeavours to combat Lyme borreliosis.

43

## 44 **Introduction**

45 Lyme borreliosis is the most common vector-borne disease in Europe and the USA. It  
46 is caused by the spirochetes *Borrelia burgdorferi* in the USA or by the *B. burgdorferi*  
47 sensu lato (s.l.) complex comprising *B. afzelii*, *B. garinii*, and *B. burgdorferi* in Europe.  
48 *Borrelia* spirochetes are maintained in nature through an enzootic cycle involving small  
49 vertebrates, primarily rodents and birds, and are vectored by ticks of the genus *Ixodes*  
50 (1).

51 Understanding the complex interactions within the tick-*Borrelia*-host triangle is  
52 indispensable for the development of efficient vaccines or drugs against Lyme disease.  
53 Progress in understanding borreliosis transmission has been achieved during the last  
54 three decades, mainly in the USA, by investigation of *B. burgdorferi* strains vectored  
55 by *I. scapularis*. Three possible hypotheses for *Borrelia* transmission were proposed  
56 in the early studies: (i) the first observations favored a direct infection via mouth parts  
57 by regurgitation of the spirochetes present in the midgut contents (2); (ii) a salivary  
58 route of transmission that assumed systemic distribution of spirochetes within the tick  
59 body (3); (iii) infection via contaminated faeces was also considered (2, 4) but soon  
60 abandoned (5). A number of following studies corroborated the salivary route of *B.*  
61 *burgdorferi* transmission by *I. scapularis* as the most likely. Therefore, the current,  
62 generally accepted model of Lyme disease transmission can be summarized as  
63 follows: At the beginning, larval *I. scapularis* acquire *Borrelia* spirochetes from infected  
64 vertebrate reservoir hosts. *Borrelia burgdorferi* spirochetes then multiply rapidly in

65 feeding larvae and during the first days post-repletion. The number of spirochetes are  
66 then dramatically reduced during subsequent molting (6). Spirochetes persisting in the  
67 nymphal midgut upregulate OspA (7), and stay attached to the TROSPA receptor on  
68 the surface of the midgut epithelial cells (8). Spirochetes remain in this intimate  
69 relationship until the next blood meal. As the infected nymphs start feeding on the  
70 second host, *Borrelia* spirochetes sense appropriate physiochemical stimuli that trigger  
71 their replication (7, 9). Their numbers increase exponentially (10, 11), and the  
72 spirochetes downregulate OspA and upregulate OspC (7, 12). Simultaneously, ticks  
73 downregulate the production of TROSPA (8). These changes help spirochetes to  
74 detach from the midgut, penetrate into the hemolymph, migrate to the salivary glands  
75 (8) and infect the vertebrate host.

76 Understanding of Lyme borreliosis in Europe lags far behind the USA, mainly because  
77 the situation is complicated by the existence of several different species in the *B.*  
78 *burgdorferi* s.l. complex that act as causative agents of the disease. To date, only a  
79 few papers have been published regarding transmission of *B. burgdorferi* s.l. strains  
80 by *I. ricinus* ticks, suggesting that the transmission of European *Borrelia* strains might  
81 differ from the model cycle described for *B. burgdorferi*/*I. scapularis* (see (5) for review).

82 In this study, we have performed a quantitative tracking of *B. afzelii* from infected mice  
83 to *I. ricinus* and back to naïve mice. We further tested the role of tick saliva in infectivity  
84 and survival of *B. afzelii* spirochetes. Based on our data, we proposed the concept of  
85 a direct 'gut-to-mouth' route of *B. afzelii* transmission from infected *I. ricinus* nymphs  
86 to the host.

87

## 88 **Results**

## 89 ***Borrelia afzelii* – *Ixodes ricinus* transmission model**

90 In order to understand the Lyme disease problem in Europe, the development of a  
91 transmission model is essential for the European vector *I. ricinus* and local *Borrelia*  
92 strains of the *B. burgdorferi* s.l. complex. For this purpose, we established a novel,  
93 reliable and robust transmission model employing C3H/HeN mice, *I. ricinus* ticks and  
94 the *B. afzelii* CB43 strain isolated from local ticks (13). This strain develops systemic  
95 infections in mice and causes pathological changes in target tissues. Variably intensive  
96 lymphocytic infiltrations were detected in the heart, where the majority of inflammatory  
97 cells were concentrated in the subepicardial space with infiltration of myocytes (Fig.  
98 1A). Inflammatory infiltration was prominent within the urinary bladder. The most  
99 prominent changes were in the submucosa, close to the basal membrane (Fig. 1B). In  
100 the skin, weak infiltration of the epidermis and dermis was documented, however most  
101 lymphocytes were found in deep soft tissues (Fig. 1C). *Borrelia afzelii* CB43 also turned  
102 out to be highly infectious for *I. ricinus* ticks as positive infection was detected in 90-  
103 100% of molted nymphs that fed on infected mice as larvae.

## 104 ***B. afzelii* population grows rapidly in engorged *I. ricinus* larvae and during** 105 **molting to nymphs**

106 Studies on the dynamic relationship between the Lyme disease spirochete and its tick  
107 vector were previously performed on an *I. scapularis*/*B. burgdorferi* model (6, 10).  
108 Nevertheless, little is known about the growth kinetics of European *B. afzelii* in *I. ricinus*  
109 ticks. The number of spirochetes was determined in engorged *I. ricinus* larvae fed on  
110 *B. afzelii*-infected mice and then at weekly intervals until larvae molted to nymphs.  
111 Measurements were completed at the 20th week post-molt. The mean number of  
112 spirochetes in fully fed *I. ricinus* larvae examined immediately after repletion was

113 relatively low,  $618 \pm 158$  (SEM) spirochetes per tick. Then the spirochetes multiplied  
114 rapidly in engorged larvae and their numbers continued to increase during molting to  
115 nymphs. The maximum number of spirochetes,  $21\,005 \pm 4\,805$  (SEM) per tick, was  
116 detected in nymphs in the 2nd week after molting. Spirochetal proliferation then halted  
117 and the average spirochete number became relatively stable from the 4th to 20th  
118 weeks post-molt, slightly oscillating around the average number of about 10 000  
119 spirochetes per tick (Fig. 2).

### 120 ***B. afzelii* numbers in *I. ricinus* nymphs dramatically drop during feeding**

121 We further examined the absolute numbers of *B. afzelii* spirochetes in infected *I. ricinus*  
122 nymphs during feeding. Nymphs were fed on mice, forcibly removed at time intervals  
123 24, 48 and 72 hours after attachment and the spirochetes were then quantified by  
124 qPCR. Prior to feeding, the mean number of spirochetes per nymph was  $10\,907 \pm 2$   
125  $590$  (SEM). After 24 hours of the tick feeding, the number of spirochetes decreased to  
126  $7\,492 \pm 3\,294$  (SEM). In the following 2nd and 3rd day of blood intake, the numbers  
127 continued to drop to  $2\,447 \pm 801$  (SEM) and  $720 \pm 138$  (SEM) spirochetes per tick,  
128 respectively (Fig. 3). As this result was in striking contrast to the reported progressive  
129 proliferation of *B. burgdorferi* during *I. scapularis* nymphal feeding (10, 11), we  
130 confirmed the gradual decrease in *B. afzelii* spirochetes in the midguts of feeding *I.*  
131 *ricinus* nymphs using confocal immuno-fluorescence microscopy. By contrast, a  
132 parallel examination of the salivary glands from the same nymphs demonstrated that  
133 no spirochetes were present in this tissue at any stage of feeding (Fig. 4).

### 134 **Ability of *B. afzelii* spirochetes to develop a chronic infection in mice increases** 135 **with feeding time**

136 It is generally known that the risk of acquiring Lyme disease increases with the length  
137 of tick feeding (5). In subsequent experiments, we focused on the infectivity of *B. afzelii*  
138 transmitted via *I. ricinus* nymphs. To determine the minimum length of tick attachment  
139 time required to establish a permanent infection in mice, *B. afzelii* infected nymphs  
140 were allowed to feed on mice for 24, 48, and 72 hours (10 nymphs per mouse). The  
141 ability of *B. afzelii* spirochetes to promote a chronic infection increased with the length  
142 of tick attachment. All mice exposed to the bite of *B. afzelii* infected ticks for 24 hours  
143 remained uninfected, whereas 8/10 mice exposed for 48 hours and 10/10 mice  
144 exposed for 72 hours became infected. These results show that the time interval  
145 between 24 and 48 hours of exposure to the *B. afzelii* infected tick is critical for the  
146 development of a systemic murine infection.

147 ***B. afzelii* spirochetes are already present in the murine dermis on the first day of**  
148 **tick feeding**

149 The delay in development of a *B. afzelii* infection in mice may support the notion that  
150 the spirochetes are still “on the road” towards the tick salivary glands during the first  
151 day after attachment. To test this hypothesis, we determined the number of *B. afzelii*  
152 in murine skin biopsies from the tick feeding site at time intervals of 24, 48 and 72  
153 hours after feeding. Surprisingly, skin biopsies from 9/10, 10/10, and 10/10 mice were  
154 PCR positive at time intervals of 24, 48 and 72 hours, respectively. Analysis by qPCR  
155 further revealed that there were no significant differences in the number of spirochetes  
156 in skin samples at defined time intervals (Fig. 5A). This intriguing result was also  
157 confirmed by confocal microscopy, revealing clearly the presence of spirochetes in  
158 murine skin biopsies during the first day of tick feeding (Fig. 5B). Together with the  
159 rapid decrease in spirochetal number in nymphal midguts during feeding (Figs. 3 and

160 4), these results imply that the massive migration of spirochetes to the host  
161 commences soon after the blood meal uptake.

162 **Tick saliva does not protect the early *B. afzelii* spirochetes against host**  
163 **immunity**

164 The apparent contradiction between the early entry of *B. afzelii* spirochetes into the  
165 vertebrate host and their delayed capability to develop a permanent infection supports  
166 the concept of the tick saliva role in the successful dissemination and survival of  
167 spirochetes within the host body. In order to verify that tick saliva is essential for *B.*  
168 *afzelii* survival in the mice, we designed and performed the following experiment. In  
169 experimental group 1, uninfected *I. ricinus* nymphs (white labelled) were allowed to  
170 feed simultaneously with *B. afzelii*-infected nymphs (red labelled) at the same feeding  
171 site. After 24 hours of cofeeding, *B. afzelii*-infected nymphs were removed, while  
172 uninfected ticks fed on mice until repletion and served as a source of saliva. In control  
173 group 1, *B. afzelii*-infected nymphs fed for 24 hours without any support of uninfected  
174 ticks. In control group 2, *B. afzelii*-infected nymphs were allowed to feed until repletion.  
175 Four weeks later, *B. afzelii* infections in ear, heart and urinary bladder biopsies were  
176 examined by PCR. No infection was detected in any of examined tissues in  
177 experimental and control group 1, where the infected ticks fed for only 24 hours. By  
178 contrast, all tissues were PCR positive in control group 2, where the infected nymphs  
179 fed until repletion (Fig. 6A). These results revealed that the presence of uninfected  
180 ticks and their saliva is not sufficient to protect early spirochetes against elimination by  
181 the host immune system.

182 A possible explanation of this unanticipated result might be that unlike the uninfected  
183 tick, the salivary glands of *Borrelia*-infected ticks express a different spectrum of  
184 molecules that assist their transmission and survival within the vertebrate host (14–



185 16). Therefore, we also examined the protective effect of saliva from *Borrelia*-infected  
186 nymphs. The experimental setup was the same as above with one exception: In  
187 experimental group 2, nymphs infected with a different strain of *B. burgdorferi* were  
188 allowed to feed until repletion next to *B. afzelii*-infected nymphs that were removed  
189 after 24 hours. In control group 3, *B. afzelii*-infected and *B. burgdorferi*-infected nymphs  
190 were allowed to feed until repletion. Four weeks after repletion, mice were specifically  
191 examined for the presence of one or both *Borrelia* strains using *rrs-rrlA* IGS PCR  
192 amplification. All mice in experimental group 2 were positive for *B. burgdorferi*, while  
193 *B. afzelii* was not detected in any of analyzed murine tissues. All mice in control group  
194 3 tested positive for both *B. afzelii* and *B. burgdorferi* (Fig. 6B). This result implies that  
195 the saliva from *B. burgdorferi* infected ticks was also not capable of ensuring survival  
196 of *B. afzelii* transmitted to mice at the early feeding stage.

### 197 **Infectivity by *B. afzelii* is gained in the midgut and changes during nymphal** 198 **feeding**

199 Another possible explanation for the delayed capability of *B. afzelii* to infect mice was  
200 that infectivity of the spirochetes changed during the course of nymphal feeding. To  
201 test the infectivity of *B. afzelii* during different phases of nymphal feeding, *B. afzelii*  
202 containing guts were dissected from unfed, 24 hour, 48 hour and 72 hour-fed *I. ricinus*  
203 nymphs and subsequently injected into C3H/HeN mice (5 guts/mouse). *B. afzelii*  
204 spirochetes from unfed nymphs were not infectious for mice. Spirochetes from nymphs  
205 fed for 24 hours infected 3 out of 5 inoculated mice and all mice became infected after  
206 the injection of spirochetes from 48 hour-fed nymphs. Interestingly, mice inoculated  
207 with spirochetes from nymphs fed for 72 hours established *B. afzelii* infection only in 1  
208 out of 5 mice. This result suggests that the capability of *B. afzelii* spirochetes to infect  
209 mice is gained in the tick gut and peaks about the 2<sup>nd</sup> day of feeding.

210 **Infectivity of *B. afzelii* is linked to differential gene expression during tick**  
211 **feeding and transmission**

212 Previous research demonstrated that transmission of *B. burgdorferi* from *I. scapularis*  
213 to the host is associated with changes in expression of genes encoding outer surface  
214 proteins OspA, OspC or the fibronectin-binding protein BBK32 (7, 17–19). In order to  
215 examine whether the infectivity of *B. afzelii* may depend on expression of orthologous  
216 genes, we performed qPCR analysis to determine the status of *ospA*, *ospC* and *bbk32*  
217 expression by *B. afzelii* spirochetes in unfed and feeding *I. ricinus* nymphs as well as  
218 in murine tissues 4 weeks post infection. The gene encoding OspA was abundantly  
219 expressed in unfed ticks, down-regulated during tick feeding and was hardly detectable  
220 in mice. The *B. afzelii ospC* gene was lowly expressed in unfed *I. ricinus* nymphs. Its  
221 expression steadily increased during feeding, with the highest levels of *ospC* mRNA at  
222 the 3<sup>rd</sup> day of feeding. Significant *ospC* expression was also detected in mice with a  
223 permanent *B. afzelii* infection. Similarly, a gradual up-regulation of *bbk32* was evident  
224 with the progress of tick feeding and gene transcription was fully induced during  
225 mammalian infection (Fig. 7).

226

227 **Discussion**

228 Understanding the dynamics of *Borrelia* spirochete transmission is crucial for  
229 development of strategies for preventing Lyme disease. Recently, we managed to  
230 implement a reliable transmission model for European Lyme disease that involves the  
231 vector *I. ricinus* and the most common causative agent of borreliosis in Europe - *B.*  
232 *afzelii* spirochetes. This allowed us to quantitatively track the growth kinetics and

233 infectivity of *B. afzelii* during the *I. ricinus* life cycle and compare it to data known for  
234 the *I. scapularis/B. burgdorferi*.

235 In nature, infection is acquired by larval or nymphal ticks feeding on an infected host.  
236 Absolute quantification of *B. afzelii* spirochetes during larval development and molting  
237 to nymphs revealed that *I. ricinus* larva imbibes relatively low spirochete numbers  
238 (~600 per tick). The number of *B. afzelii* then gradually increases during larval molting  
239 and reaches its maximum of about 20 000 spirochetes per tick two weeks after molting  
240 to nymphs. The level then stabilizes at about 10 000 spirochetes in starving nymphs  
241 (Fig. 2). This course of spirochetal burden is roughly in line with the data reported for  
242 *I. scapularis/B. burgdorferi* (6). However, compared to our observations, these authors  
243 described a dramatic decrease in *B. burgdorferi* numbers during *I. scapularis* molting.  
244 They speculate that it was due to depleted amounts of N-acetylglucosamine – an  
245 important building block of integumentary chitin but also a key component for  
246 spirochetal development. The limited availability of other nutrients might also be the  
247 reason for halted proliferation of spirochetes in molted nymphs. With its adoption of a  
248 parasitic lifestyle, the bacterium is an auxotroph for all amino acids, nucleotides and  
249 fatty acids. It also lacks genes encoding enzymes for the tricarboxylic acid cycle and  
250 oxidative phosphorylation (20, 21). Therefore, *Borrelia* spirochetes in the tick midgut  
251 are completely dependent on nutrients derived from ingested blood.

252 A striking difference between *I. ricinus/B. afzelii* and *I. scapularis/B. burgdorferi* was  
253 observed in spirochete numbers in the nymphal midgut during feeding. We found that  
254 *B. afzelii* numbers dramatically decrease from about ~10 000 spirochetes present in  
255 flat *I. ricinus* nymphs to only ~700 spirochetes in nymphs fed for three days (Fig. 3).  
256 This result is in sharp contrast with the data previously published for *I. scapularis/B.*  
257 *burgdorferi*. Using antibody-based detection, De Silva and Fikrig demonstrated that the

258 total number of *B. burgdorferi* increased from several hundred in starved nymphs, to  
259 almost 170 000 spirochetes on the 3rd day of nymphal feeding (10). Later, these data  
260 were confirmed in a qPCR study showing that *B. burgdorferi* spirochetes in tick midguts  
261 increased six fold, from about 1 000 before attachment to about 6 000 at 48 hours after  
262 attachment (11).

263 It is commonly known that the risk of Lyme disease increases with the length of time a  
264 tick is attached. It was stated that *I. scapularis* ticks infected with *B. burgdorferi*  
265 removed during the first 2 days of attachment do not transmit the infection (11, 17).  
266 Our data show that *B. afzelii* spirochetes require less time to establish a permanent  
267 infection. Most mice became infected by 48 hours of attachment. This is in agreement  
268 with the previously published results showing that *B. afzelii* infected *I. ricinus* nymphs  
269 transmit the infection earlier than *B. burgdorferi* infected ticks (22).

270 Nevertheless, quantification by qPCR as well as microscopic examination of *B. afzelii*  
271 in the mouse dermis revealed that a substantial number of *B. afzelii* spirochetes enter  
272 the host earlier than they are able to develop a systemic infection (Fig. 5). This is in  
273 agreement with their significant decrease in the tick midgut during feeding (Figs. 3 and  
274 4) and suggests that massive numbers of *B. afzelii* spirochetes leave the nymphs as  
275 early as the first day of feeding. The presence of spirochetes in mouse dermis prior to  
276 becoming infectious was also reported for *I. scapularis*/*B. burgdorferi*. Ohnishi et al.  
277 observed non-infectious spirochetes in skin samples from mice that were exposed to  
278 *B. burgdorferi* infected *I. scapularis* nymphs for less than 53 hours (17). Moreover,  
279 Hodzic et al. also reported the presence of *B. burgdorferi* spirochetes in four out of  
280 eight mice 24 hours after *I. scapularis* attachment (23). These data suggest that  
281 *Borrelia* spirochetes invade the host at very early time-points of tick feeding but early  
282 spirochetes are not able to develop a systemic infection. There could be two

283 explanations for this observation. Firstly, bioactive molecules present in tick saliva are  
284 crucial for successful dissemination and survival of spirochetes within the host body.  
285 Therefore, the early spirochetes cannot colonize the host without sufficient protection  
286 and support of the tick saliva (24, 25). Secondly, early spirochetes that are transmitted  
287 to the vertebrate host are not infectious. A substantial body of work has been  
288 performed to elucidate the various tick bioactive molecules, mainly comprising a  
289 complex cocktail of salivary proteins that dampens the host's defenses against blood  
290 loss and the development of inflammatory and complement reactions at the feeding  
291 site (26). Several tick molecules have been suggested to be crucial for *Borrelia*  
292 acquisition in ticks and transmission to the next host during subsequent feeding  
293 (reviewed in (27)). To test the role of tick saliva in survival of early spirochetes, we  
294 performed a co-feeding experiment in which the early *B. afzelii* spirochetes were under  
295 the protection of uninfected ticks or ticks infected with *B. burgdorferi* (Fig. 6). This  
296 experiment clearly showed that the presence of tick saliva is not sufficient for protection  
297 and survival of early spirochetes as all mice remained uninfected with *B. afzelii*  
298 spirochetes. Therefore, we tested how infectivity of *B. afzelii* changes during tick  
299 feeding. A number of studies provide solid evidence that *Borrelia* spirochetes change  
300 expression of their surface antigens during feeding and transmission to the host,  
301 making it possible for spirochetes to specifically adapt to the tick or the host  
302 environment, as required (7, 28, 29). Changes in gene expression of our model  
303 spirochete seem to be the main event that promotes increasing infectivity during tick  
304 feeding. *Borrelia afzelii* spirochetes in unfed ticks showed high levels of expression of  
305 *ospA* and negligible expression of *ospC* and *bbk32*. In this tick mode, spirochetes were  
306 not infectious for mice. As feeding progressed, *ospA* was downregulated and *ospC*  
307 and *bbk32* were upregulated, which correlated with increasing infectivity of *B. afzelii*.

308 The highest level of infection was observed in mice inoculated with spirochetes from  
309 48 hour-fed nymphs. By this time, all mice had developed the infection. Interestingly,  
310 spirochetes from 72 hour-fed nymphs infected only one out of five mice. This decrease  
311 is likely associated with a concomitant, substantially reduced number of *B. afzelii* in the  
312 midguts of nymphs fed for 3 days (Figs. 3 and 4).

313 The route of *Borrelia* spirochete transmission has been the subject of controversy for  
314 a long time. In 1984, Burgdorfer suggested that spirochetal development in most ticks  
315 (*I. scapularis* and *I. ricinus*) occurs in the midgut. Additional tissues, including salivary  
316 glands, were considered to be free of spirochetes in most of the ticks. It was suggested  
317 that transmission occurs by regurgitation of infected gut contents or via saliva by ticks  
318 with a generalized infection (4). Benach et al. presented similar findings in their  
319 extensive histological study. They stated that *B. burgdorferi* are able to enter the  
320 hemocoel during the midfeeding period and develop a systemic infection in the  
321 hemolymph and central ganglion. However, *B. burgdorferi* were never seen within the  
322 lumen of the salivary gland or attached to cells of the salivary acini (2). Salivary route  
323 of Lyme disease transmission came into consideration since 1987, when Ribeiro and  
324 colleagues reported the presence of spirochetes in saliva of pilocarpine treated ticks  
325 (3) and then broadly accepted after microscopic detection of spirochetes within the  
326 salivary glands and ducts of fully fed *I. scapularis* nymphs (30). Nevertheless, the  
327 spirochete numbers present in salivary glands of *I. scapularis* nymphs are minuscule  
328 and hardly detectable (31, 32).

329 We have never observed *B. afzelii* present in salivary glands at any stage of tick  
330 feeding. The absence of spirochetes in salivary glands is surprising since large  
331 numbers of spirochetes were supposed to pass from the midgut to the feeding lesion  
332 during the three day course of nymphal feeding. Collectively, these results rather testify

333 against the salivary transmission of *B. afzelii* by *I. ricinus*. Instead, we assume that  
334 regurgitation, or rather active reverse migration of motile spirochetes from midgut to  
335 the mouthpart (for which we coin the term ‘gut-to-mouth’ route) is the most probable  
336 way of transmission of *B. afzelii* from *I. ricinus* nymph to the host. This alternative way  
337 of *B. afzelii* transmission avoiding *I. ricinus* hemocoel and salivary glands is indirectly  
338 supported also by our recent research showing that silencing of tick immune molecules  
339 or elimination of phagocytosis in tick hemocoel by injection of latex beads had no  
340 obvious impact on *B. afzelii* transmission (33–35).

341 From our results we conclude that *B. afzelii* has a unique transmission cycle that, in  
342 many aspects, differs from the generally accepted salivary route of *B. burgdorferi*  
343 transmission by *I. scapularis*. *Borrelia afzelii* in flat *I. ricinus* nymphs represents a  
344 relatively abundant population of spirochetes. Once the tick finds a host, *B. afzelii*  
345 immediately start their transmission, most likely directly from the midgut to the feeding  
346 cavity. *B. afzelii* also seems to be less dependent on its tick vector. The main  
347 requirement for successful host colonization is the change in outer surface protein  
348 expression that occurs in the tick gut during the course of feeding. Spirochetes  
349 ‘switched’ to the proper, vertebrate mode are then able to survive within the host even  
350 if the tick is not present. The 24-48 hour time window between tick attachment and  
351 transmission of infectious spirochetes is the critical period in the whole process. These  
352 findings collectively point to the *Borrelia*-tick midgut interface as the correct target in  
353 our endeavours to combat Lyme disease transmission.

354

---

## 355 **Materials and Methods**

### 356 **Laboratory animals**

357 *Ixodes ricinus* larvae and nymphs were obtained from the breeding facility of the  
358 Institute of Parasitology, Biology Centre, Czech Academy of Sciences. Ticks were  
359 maintained in wet chambers with a humidity of about 95%, temperature 24°C and  
360 day/night period set to 15/9 hours. To prepare both infected and uninfected *I. ricinus*  
361 nymphs, the larvae were fed on either infected or uninfected mice, allowed to molt to  
362 nymphs, and after 4–6 weeks were used for further experiments. Inbred, pathogen free  
363 C3H/HeN mice (The Jackson Laboratory, Bar Harbor, ME, USA), were used for the  
364 pathogen transmission experiments.

### 365 **Ethics Statement**

366 All experimental animals were treated in accordance with the Animal Protection Law  
367 of the Czech Republic No. 246/1992 Sb., ethics approval No. 161/2011. The animal  
368 experimental protocol was approved by the Czech Academy of Sciences Animal Care  
369 & Use Committee (Protocol Permit Number: 102/2016).

### 370 **Infection of mice and ticks**

371 Low passage strains of *B. afzelii* CB43 (13), and *B. burgdorferi* SLV-2(36) were grown  
372 in BSK-H medium (Sigma-Aldrich, St. Louis, MO, USA) at 33°C for 5–7 days. Six  
373 weeks old female C3H/HeN mice were infected by subcutaneous injections of  $10^5$   
374 spirochetes per mouse. The presence of spirochetes in ear biopsies was verified 3  
375 weeks post injection by PCR. Clean *I. ricinus* larvae were fed on infected mice until  
376 repletion and allowed to molt. Nymphs were considered to be infected if >90% of them  
377 were PCR positive.

### 378 **Nucleic acid isolation and cDNA preparation**



379 DNA was isolated from individual larvae, nymphs, as well as murine tissues using a  
380 NucleoSpin Tissue Kit (Macherey-Nagel, Düren, Germany) according to the  
381 manufacturer's protocol.

382 Total RNA was extracted from nymphs and murine tissues using a NucleoSpin RNA  
383 Kit (Macherey-Nagel) according to the manufacturer's protocol. Isolated RNA (1 µg)  
384 served as a template for reverse-transcription into cDNA using Transcriptor High  
385 Fidelity cDNA Synthesis Kit (Roche, Basel, Switzerland). All cDNA preparations were  
386 prepared in biological triplicates.

### 387 **PCR**

388 Detection of spirochetes in ticks, as well as in murine tissues was performed by nested  
389 PCR amplification of a 222 bp fragment of a 23S rRNA gene (37). PCR reaction  
390 contained 12.5 µl of FastStart PCR Master (Roche), 10 pmol of each primer, template  
391 (4 µl of DNA for the first round, 1 µl aliquot of the first PCR product in the second  
392 round), and PCR water up to 25 µl. Primers and annealing temperatures are listed in  
393 Table 1.

394 Differentiation of *B. afzelii* and *B. burgdorferi* strains was performed by nested PCR  
395 amplifying a part of *rrs-rrlA* IGS region (38). Reaction conditions were the same as  
396 above, primers and annealing temperatures are listed in Table 1.

### 397 **Quantitative real-time PCR**

398 Total spirochete load was determined in murine and tick DNA samples by quantitative  
399 real-time PCR (qPCR) using a LightCycler 480 (Roche). qPCR reaction contained 12.5  
400 µl of FastStart Universal Probe Master (Rox) (Roche), 10 pmol of primers FlaF1A and  
401 FlaR1, 5 pmol of TaqMan probe Fla Probe1 (39) (Table 1), 5 µl of DNA, and PCR water

402 up to 25  $\mu$ l. The amplification program consisted of denaturation at 95°C for 10  
403 minutes, followed by 50 cycles of denaturation at 95°C for 15 sec and annealing +  
404 elongation at 60°C for 1 min.

405 Quantification of murine  $\beta$ -actin was performed using MmAct-F and MmAct-R primers  
406 and a MmAct-P TaqMan probe (40) (Table 1). Reaction and amplification conditions  
407 were the same as above. The spirochete burden in murine tissues was expressed as  
408 the number of spirochetes per 10<sup>5</sup> of murine  $\beta$ -actin copies. The spirochete burden in  
409 ticks was calculated as the total number of spirochetes in the whole tick body.

410 cDNAs from *B. afzelii* infected *I. ricinus* nymphs as well as murine tissues served as  
411 templates for the quantitative expression analyses by relative qPCR. Reaction  
412 contained 12.5  $\mu$ l of FastStart Universal SYBR Green Master, Rox (Roche), 10 pmol  
413 of each primer (Table 1), 5  $\mu$ l of cDNA, and PCR water up to 25  $\mu$ l. The amplification  
414 program consisted of denaturation at 95°C for 10 minutes, followed by 50 cycles of  
415 denaturation at 95 °C for 10 sec, annealing at 60 °C for 10 sec and elongation at 72  
416 °C for 10 sec. Relative expressions of *ospA*, *ospC* and *bbk32* were normalized to *flaB*  
417 using the  $\Delta\Delta$ Ct method (41).

#### 418 **Preparation of murine and tick tissues for confocal microscopy**

419 *Borrelia afzelii*-infected *I. ricinus* nymphs were fed on mice for 24 hours. Then, skin  
420 biopsies from the tick feeding site were dissected. Guts and salivary glands of unfed,  
421 24 hour-fed, 48 hour-fed and fully fed nymphs infected with *B. afzelii* were dissected in  
422 phosphate buffer. Dissected tissues were immersed in 4% paraformaldehyde for 4  
423 hours at room temperature. Tissues were then washed 3x20 min in PBS,  
424 permeabilized with 1% Triton X-100 (Tx) in PBS containing 1% BSA (Sigma) at 4°C,  
425 overnight. Next day, *Borrelia* spirochetes in tissues were stained with primary rabbit  
426 anti *B. burgdorferi* antibody (Thermo Fisher Scientific) 1:200 in PBS-Tx (0.1% Tx in

427 PBS), for 4 hours at room temperature. Tissues were then washed 3x20 min in PBS-  
428 Tx and stained with Alexa Fluor 488 goat anti-rabbit, secondary antibody (Life  
429 Technologies, Camarillo, CA, USA), 1:500 in PBS-Tx, for 2 hours at room temperature.  
430 Tissues were counterstained with DAPI for 10 minutes and washed 2x10 min in PBS.  
431 Then, slides were mounted in DABCO and examined using an Olympus FluoView  
432 FV1000 confocal microscope (Olympus, Tokyo, Japan).

### 433 **Preparation of murine tissues for histology**

434 *Borellia afzelii* infected or clean *I. ricinus* nymphs were fed on mice until repletion (5  
435 mice/group, 10 nymphs/mouse). Four weeks later, murine tissues (skin, heart, urinary  
436 bladder) from *B. afzelii* infected and uninfected mice were fixed in 10% buffered  
437 formalin, embedded in paraffin using routine procedures. 3 µm thin sections were cut  
438 and stained with hematoxylin and eosin. Slides were examined using an Olympus  
439 BX40 light microscope (Olympus).

### 440 **Statistical analysis**

441 Data were analyzed by GraphPad Prism 6 for Windows, version 6.04 and an unpaired  
442 Student's t-test was used for evaluation of statistical significance. An  $P$  value of  
443  $P < 0.05$  was considered to be statistically significant. Error bars in the graphs show the  
444 standard errors of the means.

445

### 446 **Acknowledgments**

447 This work was primarily supported by the Czech Science Foundation grant No. 17-  
448 27393S to RS, and additionally by the grants 17-27386S, 18-01832S to OH and PK,  
449 European Union FP7 project Antidote (Grant Agreement number 602272), "Centre for  
450 research of pathogenicity and virulence of parasites" (No.

451 CZ.02.1.01/0.0/0.0/16\_019/0000759) funded by European Regional Development  
452 Fund (ERDF) and Ministry of Education, Youth and Sport, Czech Republic (MEYS).  
453 We acknowledge the excellent technical assistance of Jan Erhart, Zuzana Zemanová,  
454 and Adéla Palusová. Special thanks go to Prof. Jan Kopecký and Dr. Helena  
455 Langhansová who generously provided *B. afzelii* CB43 strain. We acknowledge  
456 Martina Hajdušková ([www.biographix.cz](http://www.biographix.cz)) for the design of Fig. 6.

---

457

## 458 **References**

- 459 1. Lane RS, Piesman J, Burgdorfer W. 1991. Lyme Borreliosis: Relation of Its  
460 Causative Agent to Its Vectors and Hosts in North America and Europe. *Annu*  
461 *Rev Entomol* 36:587–609.
- 462 2. Benach JL, Coleman JL, Skinner RA, Rosler EM. 1987. Adult *Ixodes dammini*  
463 on Rabbits: A Hypothesis for the Development and Transmission of *Borrelia*  
464 *burgdorferi*. *J Infect Dis* 155:1300–1306.
- 465 3. Ribeiro JM, Mather TN, Piesman J, Spielman A. 1987. Dissemination and  
466 salivary delivery of Lyme disease spirochetes in vector ticks (Acari: Ixodidae). *J*  
467 *Med Entomol* 24:201–5.
- 468 4. Burgdorfer W. 1984. Discovery of the Lyme disease spirochete and its relation  
469 to tick vectors. *Yale J Biol Med* 57:515–20.
- 470 5. Cook MJ. 2015. Lyme borreliosis: a review of data on transmission time after  
471 tick attachment. *Int J Gen Med* 2015/01/08. 8:1–8.
- 472 6. Piesman J, Oliver JR, Sinsky RJ. 1990. Growth kinetics of the Lyme disease  
473 spirochete (*Borrelia burgdorferi*) in vector ticks (*Ixodes dammini*). *Am J Trop*

- 474 Med Hyg 42:352–357.
- 475 7. Schwan TG, Piesman J, Golde WT, Dolan MC, Rosa PA. 1995. Induction of an  
476 outer surface protein on *Borrelia burgdorferi* during tick feeding. *Proc Natl Acad*  
477 *Sci U S A* 92:2909–13.
- 478 8. Pal U, Yang X, Chen M, Bockenstedt LK, Anderson JF, Flavell RA, Norgard M  
479 V., Fikrig E. 2004. OspC facilitates *Borrelia burgdorferi* invasion of *Ixodes*  
480 *scapularis* salivary glands. *J Clin Invest* 113:220–230.
- 481 9. Carroll JA, Cordova RM, Garon CF. 2000. Identification of 11 pH-regulated  
482 genes in *Borrelia burgdorferi* localizing to linear plasmids. *Infect Immun*  
483 68:6677–84.
- 484 10. De Silva AM, Fikrig E. 1995. Growth and migration of *Borrelia burgdorferi* in  
485 *Ixodes* ticks during blood feeding. *Am J Trop Med Hyg* 53:397–404.
- 486 11. Piesman J, Schneider BS, Zeidner NS. 2001. Use of quantitative PCR to  
487 measure density of *Borrelia burgdorferi* in the midgut and salivary glands of  
488 feeding tick vectors. *J Clin Microbiol* 39:4145–8.
- 489 12. Stevenson B, Schwan TG, Rosa PA. 1995. Temperature-related differential  
490 expression of antigens in the Lyme disease spirochete, *Borrelia burgdorferi*.  
491 *Infect Immun* 63:4535–9.
- 492 13. Stěpánová-Tresová G, Kopecký J, Kuthejlová M. 2000. Identification of *Borrelia*  
493 *burgdorferi sensu stricto*, *Borrelia garinii* and *Borrelia afzelii* in *Ixodes ricinus*  
494 ticks from southern Bohemia using monoclonal antibodies. *Zentralbl Bakteriol*  
495 289:797–806.

- 496 14. Ribeiro JMC, Alarcon-Chaidez F, Francischetti IMB, Mans BJ, Mather TN,  
497 Valenzuela JG, Wikel SK. 2006. An annotated catalog of salivary gland  
498 transcripts from *Ixodes scapularis* ticks. *Insect Biochem Mol Biol* 36:111–29.
- 499 15. Hajdusek O, Sima R, Ayllon N, Jalovecka M, Perner J, de la Fuente J, Kopacek  
500 P. 2013. Interaction of the tick immune system with transmitted pathogens.  
501 *Front Cell Infect Microbiol* 3:26.
- 502 16. Sprong H, Trentelman J, Seemann I, Grubhoffer L, Rego ROM, Hajdušek O,  
503 Kopáček P, Sima R, Nijhof AM, Anguita J, Winter P, Rotter B, Havlíková S,  
504 Klempa B, Schetters TP, Hovius JWR. 2014. ANTIDotE: anti-tick vaccines to  
505 prevent tick-borne diseases in Europe. *Parasit Vectors* 7:77.
- 506 17. Ohnishi J, Piesman J, de Silva AM. 2001. Antigenic and genetic heterogeneity  
507 of *Borrelia burgdorferi* populations transmitted by ticks. *Proc Natl Acad Sci U S*  
508 *A* 98:670–675.
- 509 18. de Silva AM, Telford SR, Brunet LR, Barthold SW, Fikrig E. 1996. *Borrelia*  
510 *burgdorferi* OspA is an arthropod-specific transmission-blocking Lyme disease  
511 vaccine. *J Exp Med* 183:271–5.
- 512 19. Fikrig E, Feng W, Barthold SW, Telford SR, Flavell RA. 2000. Arthropod- and  
513 host-specific *Borrelia burgdorferi* bbk32 expression and the inhibition of  
514 spirochete transmission. *J Immunol* 164:5344–51.
- 515 20. Lackum K, Stevenson B. 2005. Carbohydrate utilization by the Lyme borreliosis  
516 spirochete, *Borrelia burgdorferi*. *FEMS Microbiol Lett* 243:173–179.
- 517 21. Radolf JD, Caimano MJ, Stevenson B, Hu LT. 2012. Of ticks, mice and men:  
518 understanding the dual-host lifestyle of Lyme disease spirochaetes. *Nat Rev*

- 519 Microbiol 10:87–99.
- 520 22. Crippa M, Rais O, Gern L. 2002. Investigations on the mode and dynamics of  
521 transmission and infectivity of *Borrelia burgdorferi sensu stricto* and *Borrelia*  
522 *afzelii* in *Ixodes ricinus* ticks. *Vector Borne Zoonotic Dis* 2:3–9.
- 523 23. Hodzic E, Feng S, Freet KJ, Borjesson DL, Barthold SW. 2002. *Borrelia*  
524 *burgdorferi* population kinetics and selected gene expression at the host-vector  
525 interface. *Infect Immun* 70:3382–3388.
- 526 24. Nuttall P, Labuda M. 2008. Saliva-assisted transmission of tick-borne  
527 pathogens. Cambridge University Press.
- 528 25. Kazimírová M, Štibrániová I. 2013. Tick salivary compounds: their role in  
529 modulation of host defences and pathogen transmission. *Front Cell Infect*  
530 *Microbiol* 3:43.
- 531 26. Francischetti IMB, Sa-Nunes A, Mans BJ, Santos IM, Ribeiro JMC. 2009. The  
532 role of saliva in tick feeding. *Front Biosci (Landmark Ed)* 14:2051–88.
- 533 27. Šimo L, Kazimirova M, Richardson J, Bonnet SI. 2017. The Essential Role of  
534 Tick Salivary Glands and Saliva in Tick Feeding and Pathogen Transmission.  
535 *Front Cell Infect Microbiol* 7:281.
- 536 28. Hubner A, Yang X, Nolen DM, Popova TG, Cabello FC, Norgard M V. 2001.  
537 Expression of *Borrelia burgdorferi* OspC and DbpA is controlled by a RpoN-  
538 RpoS regulatory pathway. *Proc Natl Acad Sci* 98:12724–12729.
- 539 29. He M, Oman T, Xu H, Blevins J, Norgard M V, Yang XF. 2008. Abrogation of  
540 ospAB constitutively activates the Rrp2-RpoN-RpoS pathway (sigmaN-sigmaS

- 541 cascade) in *Borrelia burgdorferi*. *Mol Microbiol* 70:1453–64.
- 542 30. Zung JL, Lewengrub S, Rudzinska MA, Spielman A, Telford SR, Piesman J.  
543 1989. Fine structural evidence for the penetration of the Lyme disease  
544 spirochete *Borrelia burgdorferi* through the gut and salivary tissues of *Ixodes*  
545 *dammini*. *Can J Zool* 67:1737–1748.
- 546 31. Dunham-Ems SM, Caimano MJ, Pal U, Wolgemuth CW, Eggers CH, Balic A,  
547 Radolf JD. 2009. Live imaging reveals a biphasic mode of dissemination of  
548 *Borrelia burgdorferi* within ticks. *J Clin Invest* 119:3652–65.
- 549 32. Piesman J, Schneider BS. 2002. Dynamic changes in Lyme disease  
550 spirochetes during transmission by nymphal ticks. *Exp Appl Acarol* 28:141–5.
- 551 33. Urbanová V, Hajdušek O, Mondeková HH, Šíma R, Kopáček P. 2017. Tick  
552 thioester-containing proteins and phagocytosis do not affect transmission of  
553 *Borrelia afzelii* from the competent vector *Ixodes ricinus*. *Front Cell Infect*  
554 *Microbiol* 7.
- 555 34. Urbanová V, Hajdušek O, Šíma R, Franta Z, Hönig-Mondeková H, Grunclová  
556 L, Bartošová-Sojková P, Jalovecká M, Kopáček P. 2018. IrC2/Bf – A yeast and  
557 *Borrelia* responsive component of the complement system from the hard tick  
558 *Ixodes ricinus*. *Dev Comp Immunol* 79:86–94.
- 559 35. Honig Mondekova H, Sima R, Urbanova V, Kovar V, Rego ROM, Grubhoffer L,  
560 Kopacek P, Hajdusek O. 2017. Characterization of *Ixodes ricinus* Fibrinogen-  
561 Related Proteins (Ixoderins) Discloses Their Function in the Tick Innate  
562 Immunity. *Front Cell Infect Microbiol* 7:509.
- 563 36. Golovchenko M, Sima R, Hajdusek O, Grubhoffer L, Oliver JH, Rudenko N.



- 564 2014. Invasive potential of *Borrelia burgdorferi* sensu stricto ospC type L  
565 strains increases the possible disease risk to humans in the regions of their  
566 distribution. *Parasit Vectors* 7:538.
- 567 37. Boudova L, Kazakov D V, Sima R, Vanecek T, Torlakovic E, Lamovec J,  
568 Kutzner H, Szepe P, Plank L, Bouda J, Hes O, Mukensnabl P, Michal M. 2005.  
569 Cutaneous lymphoid hyperplasia and other lymphoid infiltrates of the breast  
570 nipple: a retrospective clinicopathologic study of fifty-six patients. *Am J*  
571 *Dermatopathol* 27:375–386.
- 572 38. Bunikis J, Garpmo U, Tsao J, Berglund J, Fish D, Barbour AG. 2004.  
573 Sequence typing reveals extensive strain diversity of the Lyme borreliosis  
574 agents *Borrelia burgdorferi* in North America and *Borrelia afzelii* in Europe.  
575 *Microbiology* 150:1741–1755.
- 576 39. Schwaiger M, Peter O, Cassinotti P. 2001. Routine diagnosis of *Borrelia*  
577 *burgdorferi* (sensu lato) infections using a real-time PCR assay. *Clin Microbiol*  
578 *Infect* 7:461–469.
- 579 40. Dai J, Wang P, Adusumilli S, Booth CJ, Narasimhan S, Anguita J, Fikrig E.  
580 2009. Antibodies against a tick protein, Salp15, protect mice from the Lyme  
581 disease agent. *Cell Host Microbe* 6:482–492.
- 582 41. Pfaffl MW. 2001. A new mathematical model for relative quantification in real-  
583 time RT-PCR. *Nucleic Acids Res* 29:e45.

584

585 **FIG 1 Pathological changes in target tissues of mice with *B. afzelii* infection. (A)**

586 Low power section shows lymphocytic infiltration in the subepicardial space. **(B)**

587 Urinary bladder mucosa shows lymphoid infiltration, including dense lymphoid

588 aggregates within the submucosa. **(C)** Lymphocytic infiltrates are not prominent in the

589 skin, and the majority of lymphoid infiltration is located deep in the connective tissue.

590

591 **FIG 2 *B. afzelii* growth kinetics during larval-to-nymphal development in *I.***

592 ***ricinus*.** Spirochetes multiply in engorged larvae, as well as during molting to nymphs.

593 Then, spirochetal proliferation stops and spirochete numbers stay relatively stable from

594 the 4th to 20th week post-molt. Each datapoint represents a mean of 20 individually

595 analyzed ticks, and bars indicate standard errors of means.

596

597 **FIG 3 *B. afzelii* kinetics during nymphal feeding.** During feeding, spirochete

598 numbers continuously decrease from  $10^4$  spirochetes/tick at the beginning, to several

599 hundred spirochetes/tick at the end of nymphal feeding. Each datapoint represents the

600 mean of 20 individually analyzed ticks, and bars indicate standard errors of means.

601

602 **FIG 4 Presence of *B. afzelii* spirochetes in guts and salivary glands of feeding *I.***

603 ***ricinus* nymph.** Spirochetes are clearly visible in midguts of *B. afzelii* infected nymphs.

604 Their numbers significantly decrease during feeding. In contrast, spirochetes are

605 hardly detectable in salivary glands of feeding *I. ricinus* nymph. *B. afzelii* spirochetes

606 are stained with anti-borrelia antibody (green); nuclei are stained with DAPI (blue).

607

608 **FIG 5 Timing of *B. afzelii* transmission from *I. ricinus* nymph to mouse.** Skin  
609 biopsies from mice exposed to infected ticks for various time periods were tested for  
610 infection by qPCR (**A**) or confocal microscopy (**B**). *B. afzelii* spirochetes are present in  
611 the skin at the early stages of tick feeding. (**A**) Each datapoint represents the number  
612 of *B. afzelii* spirochetes/ $10^5$  murine genomes in individually analyzed skin biopsies. (**B**)  
613 Presence of *B. afzelii* spirochetes in murine skin at the 24 hour time point. *B. afzelii*  
614 spirochetes are stained with anti-*Borrelia* antibody (green); nuclei are stained with  
615 DAPI (blue).

616

617 **FIG 6 The role of tick saliva in *B. afzelii* survival.** Presence of neither uninfected  
618 ticks (**A**) nor *B. burgdorferi* infected ticks (**B**) and their saliva is not sufficient for  
619 protection of early *B. afzelii* against their elimination by the host immune system. ,(**C**)  
620 Differentially labeled *I. ricinus* nymphs. White: Uninfected nymph. Red: *B. afzelii*  
621 infected nymph. Blue: *B. burgdorferi* infected nymph.

622

623 **FIG 7 Comparative analysis of *ospA*, *ospC* and *bbk32* gene expression in *B.***  
624 ***afzelii* spirochetes during tick feeding and mouse infection.** Each datapoint  
625 represents the mean of 3 individually analyzed samples, and bars indicate standard  
626 errors of means.

627

628 **Table 1. Primers and probes used in this study.**

| Organism                          | Gene               | Primer name | Sequence 5'→3'                        | Annealing | Product size (bp)                  | Reference  |
|-----------------------------------|--------------------|-------------|---------------------------------------|-----------|------------------------------------|------------|
| <i>Borrelia</i><br><i>spp.</i>    | 23S<br><i>rRNA</i> | Bor-1       | AGAAGTGCTGGAGTCGA                     | 53 °C     | 260                                | (15)       |
|                                   |                    | Bor-2       | TAGTGCTCTACCTCTATTAA                  |           |                                    |            |
|                                   |                    | Bor-3       | GCGAAAGCGAGTCTTAAAAGG                 | 58 °C     | 222                                |            |
|                                   |                    | Bor-4       | ACTAAAATAAGGCTGAACTTAAAT              |           |                                    |            |
| <i>Borrelia</i><br><i>spp.</i>    | <i>rrs-rrlA</i>    | Bb IGS-F    | GTATGTTTAGTGAGGGGGGTG                 | 56 °C     | Different for<br>different species | (16)       |
|                                   |                    | Bb IGS-R    | GGATCATAGCTCAGGTGGTTAG                |           |                                    |            |
|                                   | IGS                | Bb IGS-Fn   | AGGGGGGTGAAGTCGTAACAAG                | 60 °C     |                                    |            |
|                                   |                    | Bb IGS-Rn   | GTCTGATAAACCTGAGGTCGGA                |           |                                    |            |
| <i>Borrelia</i><br><i>spp.</i>    | <i>flagellin</i>   | FlaF1A      | AGCAAATTTAGGTGCTTTCCAA                | 60 °C     | 154                                | (17)       |
|                                   |                    | FlaR1       | GCAATCATTGCCATTGCAGA                  |           |                                    |            |
|                                   |                    | Fla Probe1  | TGCTACAACCTCATCTGTCATTGTAGCATCTTTATTG |           |                                    |            |
| <i>Mus</i><br><i>musculus</i>     | <i>actin</i>       | Mmact-F     | AGAGGGAAATCGTGC GTGAC                 | 60 °C     | 137                                | (18)       |
|                                   |                    | Mmact-R     | CAATAGTGATGACCTGGCCGT                 |           |                                    |            |
|                                   |                    | Mmact-P     | CACTGCCGCATCCTCTTCTCCC                |           |                                    |            |
| <i>Borrelia</i><br><i>afzelii</i> | <i>ospA</i>        | RTospA-F    | GGTTCTGGAGTGCTTGAAGG                  | 55 °C     | 112                                | (42)       |
|                                   |                    | RTospA-R    | TGTTTTGCCATCTTCTTTG                   |           |                                    |            |
| <i>Borrelia</i><br><i>afzelii</i> | <i>bbk32</i>       | RTbbk32-F   | CACGTCTTGACAACCTTGCT                  | 55 °C     | 117                                | (42)       |
|                                   |                    | RTbbk32-R   | CCTTGCACTCACTTGAATATAG                |           |                                    |            |
| <i>Borrelia</i><br><i>afzelii</i> | <i>flaB</i>        | RTflaB-F    | GTTTATGTGGGAGCAAATCA                  | 55 °C     | 120                                | (42)       |
|                                   |                    | RTflaB-R    | ACCCTCTGAACAGGTGCAG                   |           |                                    |            |
| <i>Borrelia</i><br><i>afzelii</i> | <i>ospC</i>        | BaospC-F    | GCAGGAGCCTATGCAATATCA                 | 60 °C     | 150                                | This study |
|                                   |                    | BaospC-R    | TTTGCCAAGATCTGCATGAC                  |           |                                    |            |

629

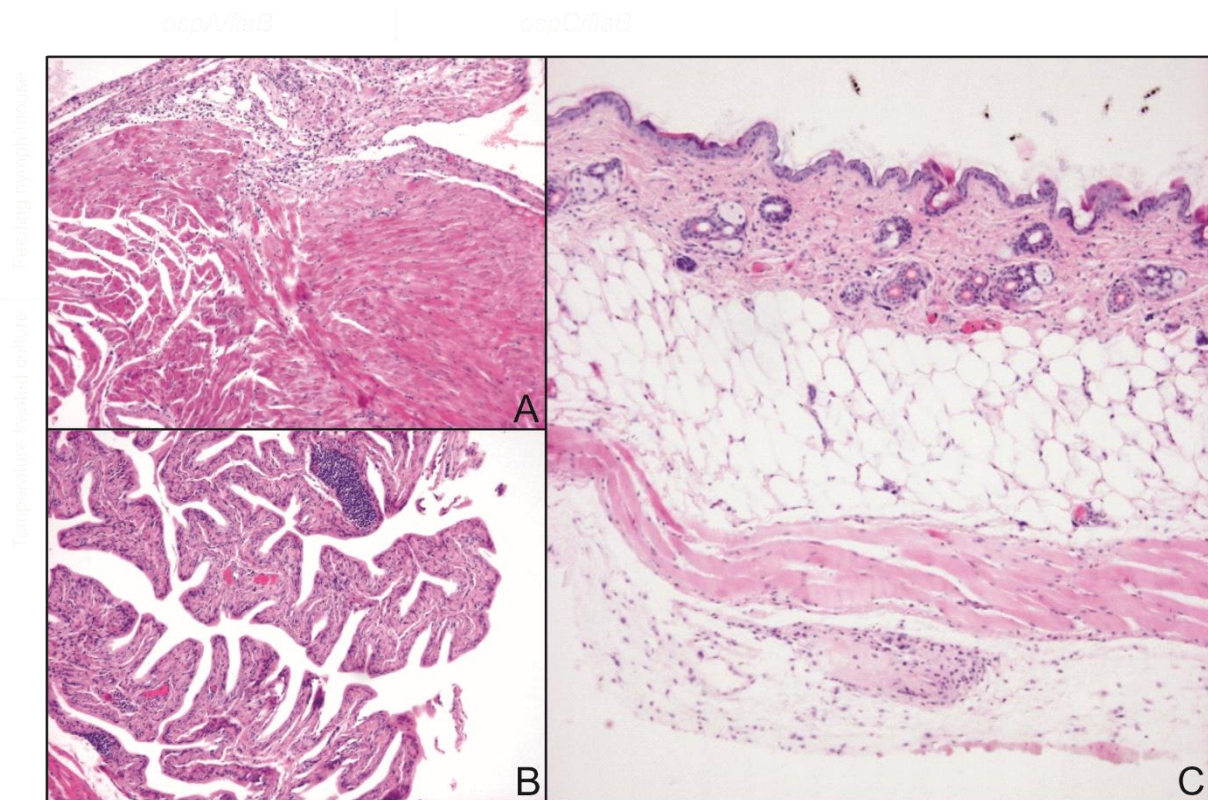

**FIG 1** Pathological changes in target tissues of mice with *B. afzelii* infection. **(A)** Low power section shows lymphocytic infiltration in the subepicardial space. **(B)** Urinary bladder mucosa shows lymphoid infiltration, including dense lymphoid aggregates within the submucosa. **(C)** Lymphocytic infiltrates are not prominent in the skin, and the majority of lymphoid infiltration is located deep in the connective tissue.

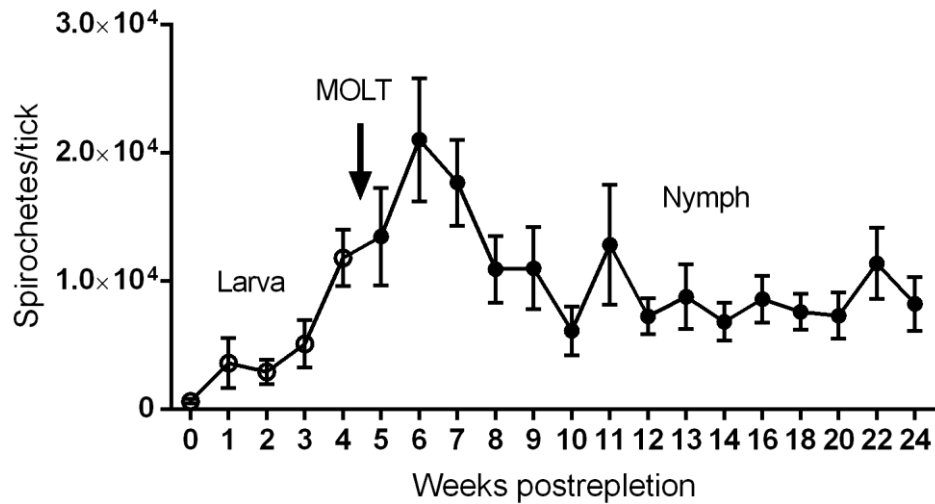

**FIG 2** *B. afzelii* growth kinetics during larval-to-nymphal development in *I. ricinus*. Spirochetes multiply in engorged larvae, as well as during molting to nymphs. Then, spirochetal proliferation stops and spirochete numbers stay relatively stable from the 4th to 20th week post-molt. Each datapoint represents a mean of 20 individually analyzed ticks, and bars indicate standard errors of means.

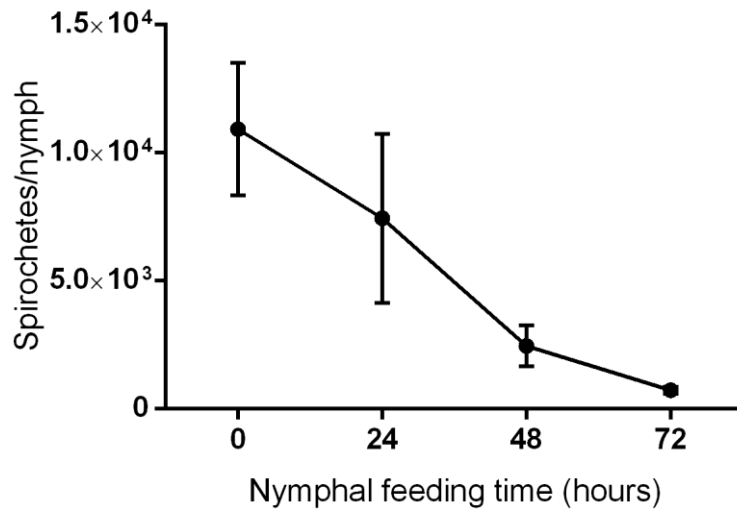

**FIG 3 *B. afzelii* kinetics during nymphal feeding.** During feeding, spirochete numbers continuously decrease from  $10^4$  spirochetes/tick at the beginning, to several hundred spirochetes/tick at the end of nymphal feeding. Each datapoint represents the mean of 20 individually analyzed ticks, and bars indicate standard errors of means.

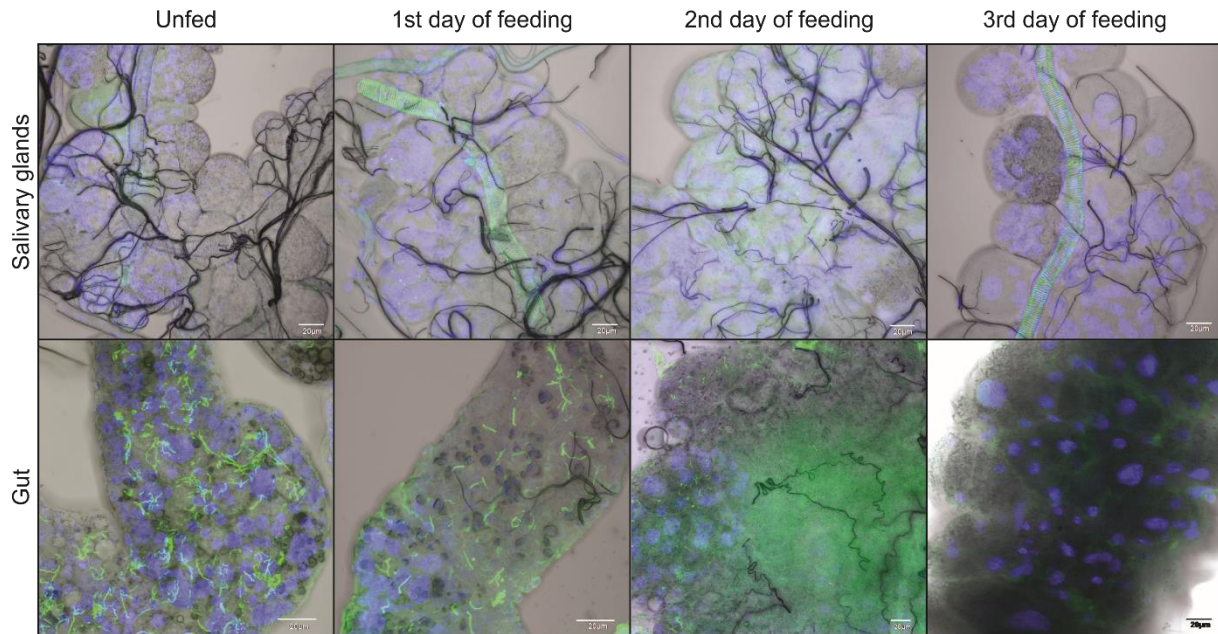

**FIG 4 Presence of *B. afzelii* spirochetes in guts and salivary glands of feeding *I. ricinus* nymph.** Spirochetes are clearly visible in midguts of *B. afzelii* infected nymphs. Their numbers significantly decrease during feeding. In contrast, spirochetes are hardly detectable in salivary glands of feeding *I. ricinus* nymph. *B. afzelii* spirochetes are stained with anti-borrelia antibody (green); nuclei are stained with DAPI (blue).



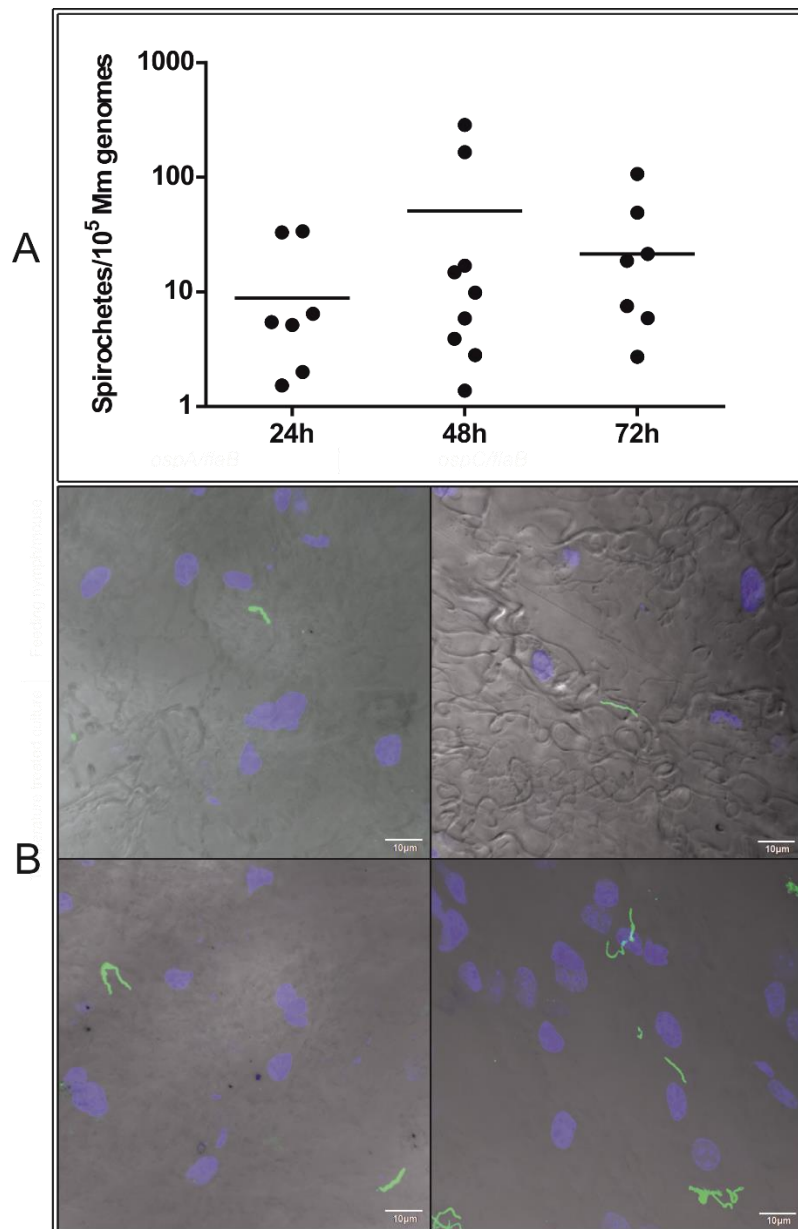

**FIG 5 Timing of *B. afzelii* transmission from *I. ricinus* nymph to mouse.** Skin biopsies from mice exposed to infected ticks for various time periods were tested for infection by qPCR (**A**) or confocal microscopy (**B**). *B. afzelii* spirochetes are present in the skin at the early stages of tick feeding. (**A**) Each datapoint represents the number of *B. afzelii* spirochetes/ $10^5$  murine genomes in individually analyzed skin biopsies. (**B**) Presence of *B. afzelii* spirochetes in murine skin at the 24 hour time point. *B. afzelii* spirochetes are stained with anti-*Borrelia* antibody (green); nuclei are stained with DAPI (blue).

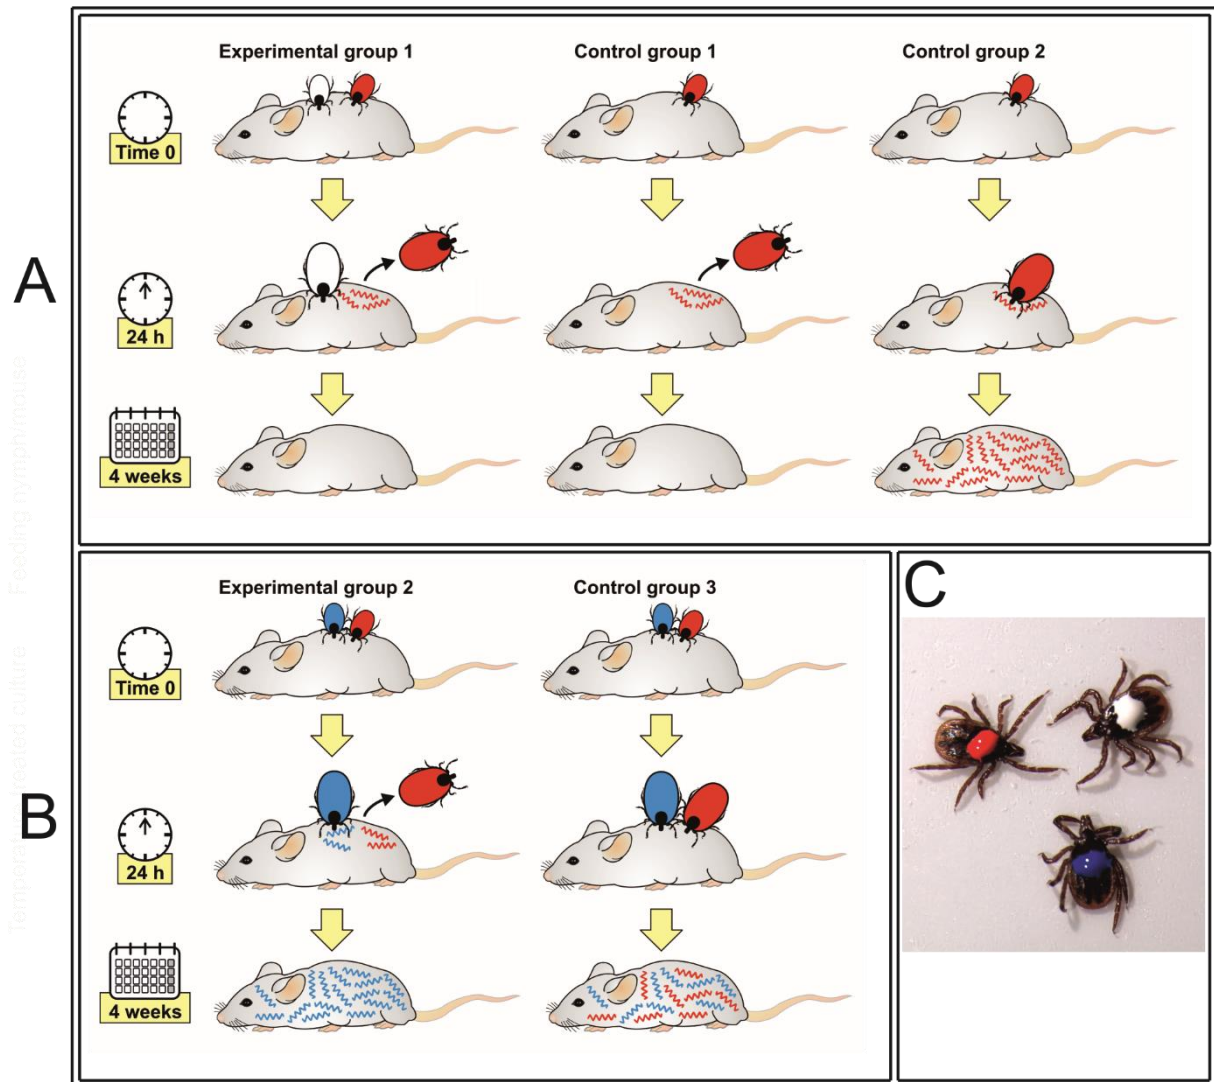

**FIG 6 The role of tick saliva in *B. afzelii* survival.** Presence of neither uninfected ticks (**A**) nor *B. burgdorferi* infected ticks (**B**) and their saliva is not sufficient for protection of early *B. afzelii* against their elimination by the host immune system. (**C**) Differentially labeled *I. ricinus* nymphs. White: Uninfected nymph. Red: *B. afzelii* infected nymph. Blue: *B. burgdorferi* infected nymph.

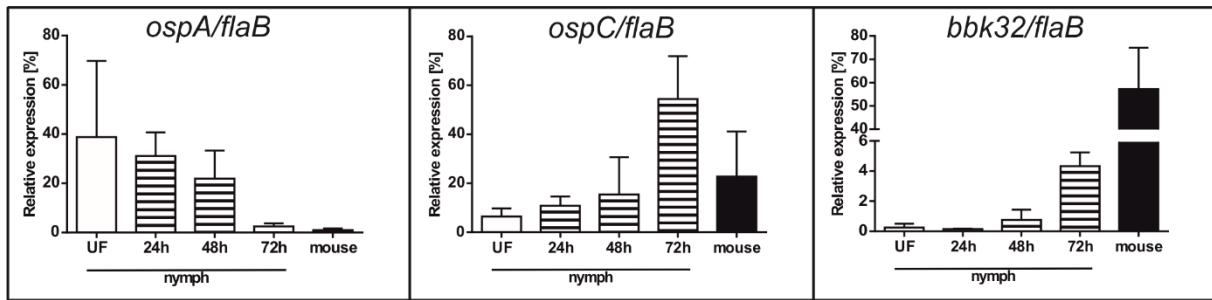

**FIG 7 Comparative analysis of *ospA*, *ospC* and *bbk32* gene expression in *B. afzelii* spirochetes during tick feeding and mouse infection.** Each datapoint represents the mean of 3 individually analyzed samples, and bars indicate standard errors of means.
